# Supplementary material
Source: publisher figshare collection journal article supplement (https://sage.figshare.com/ndownloader/files/20420700)
Supplement: Supplementary file 1 [file 20420700]

## Supplementary information

### Supplementary Figures

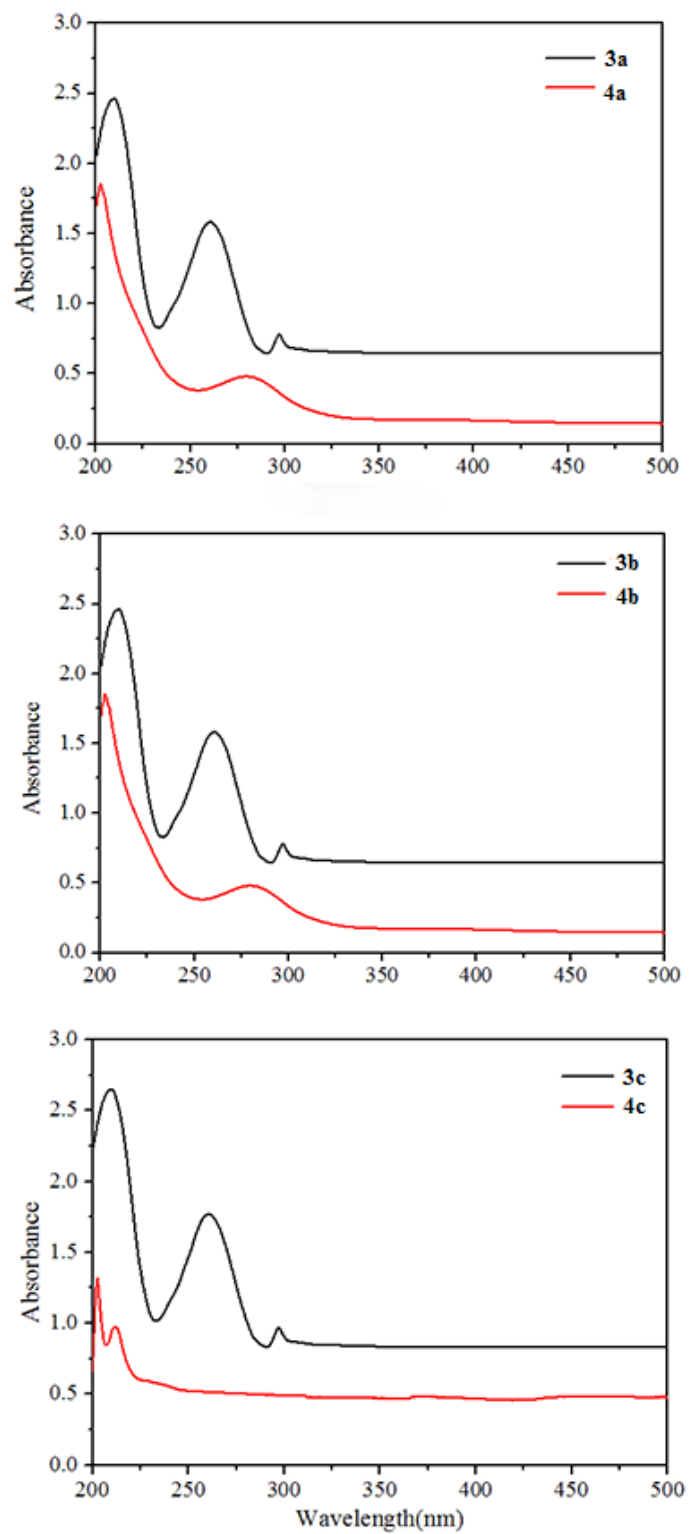

Figure. S1 UV Spectrum of ligands and nickel complexes

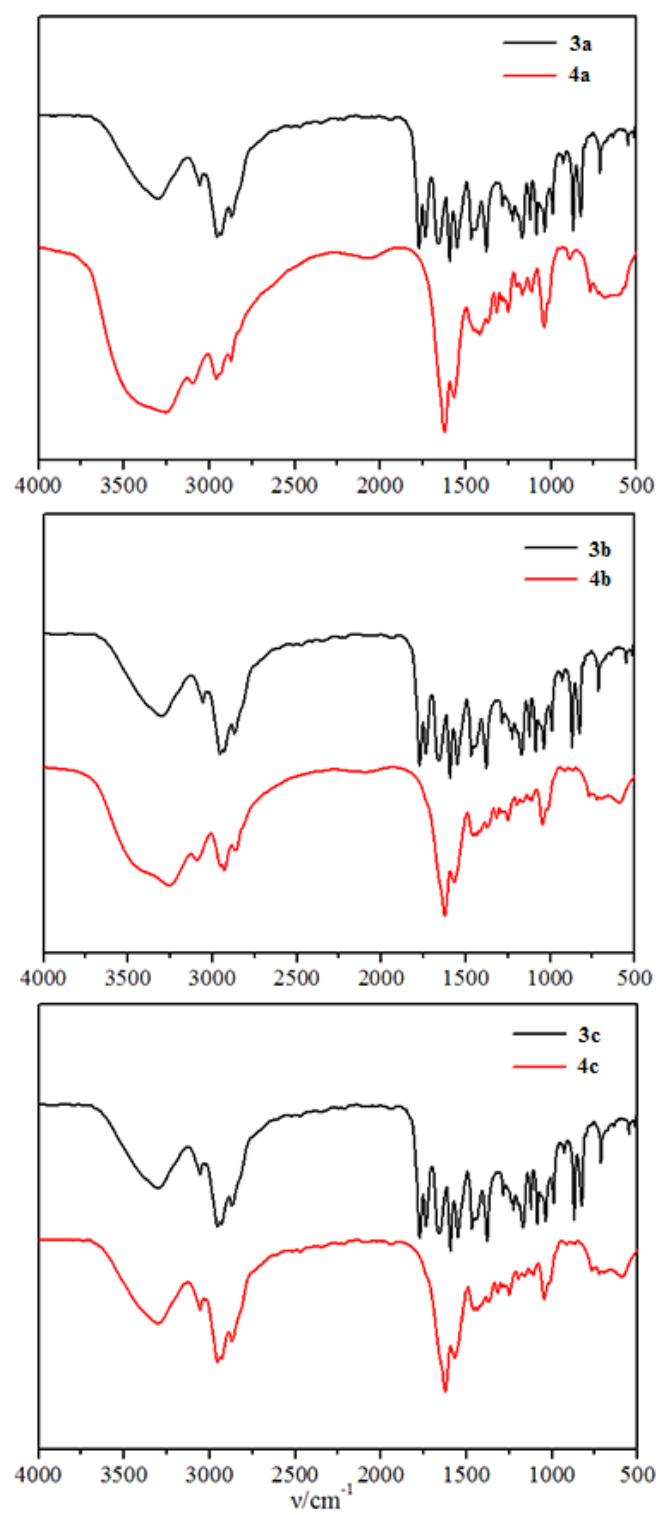

Figure. S2 Infrared spectra curves of ligands and nickel complexes

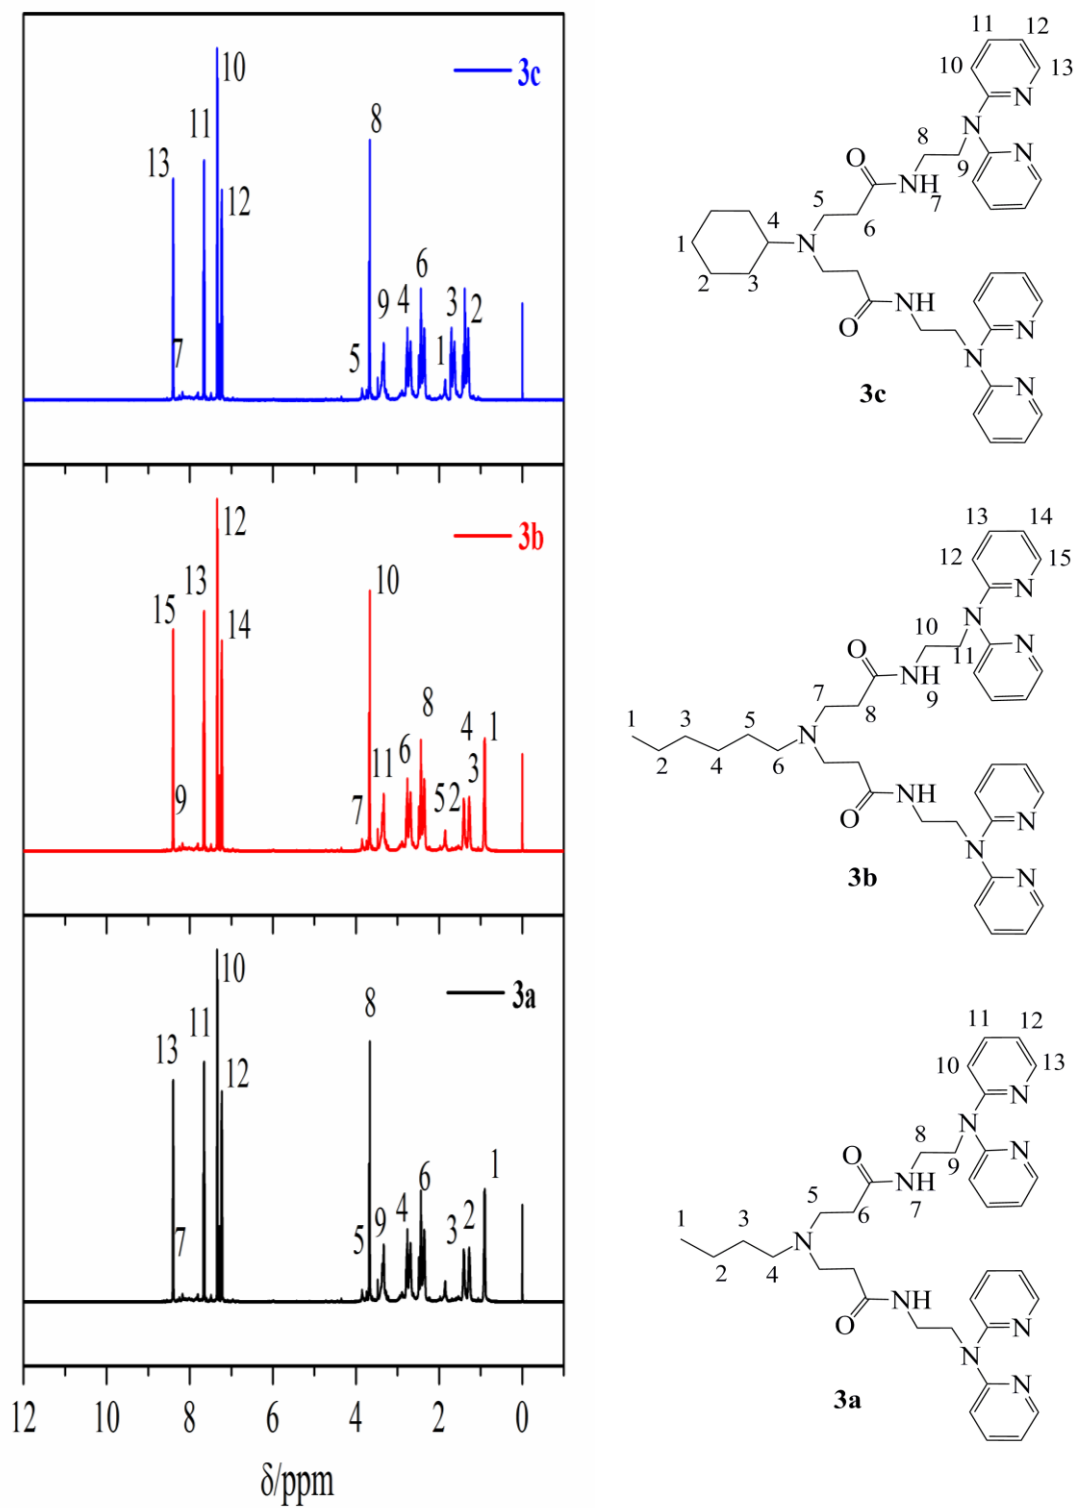

Figure. S3  $^1\text{H}$  NMR of ligands

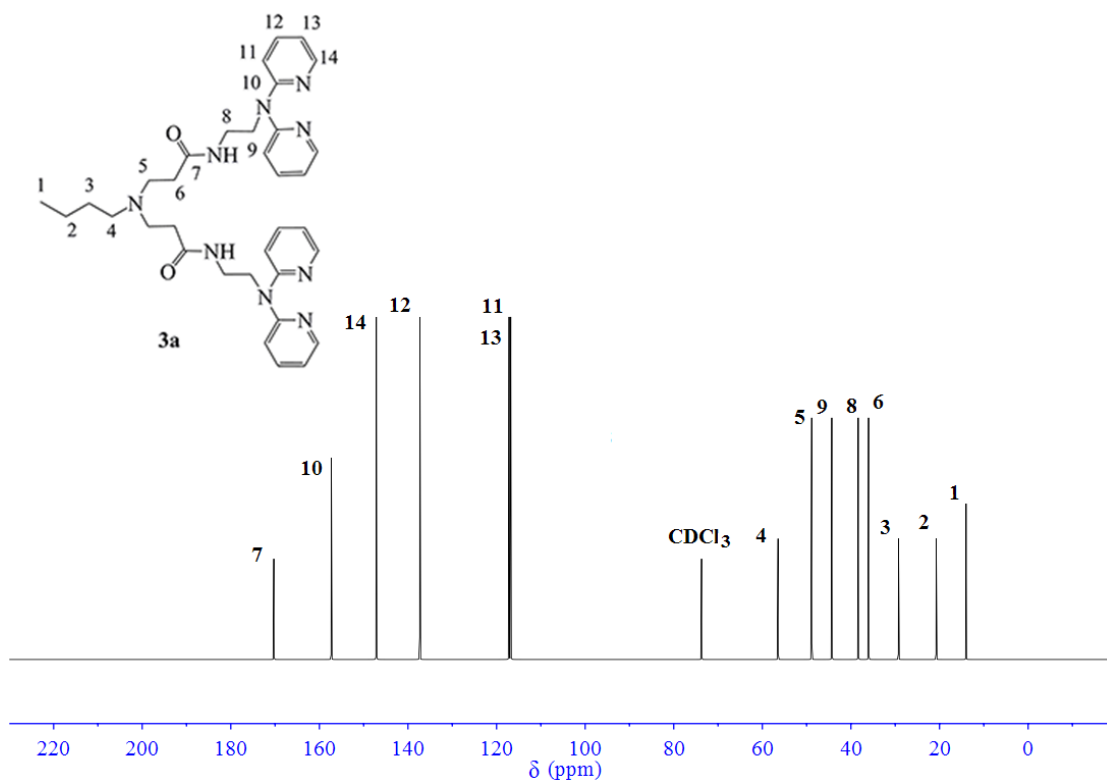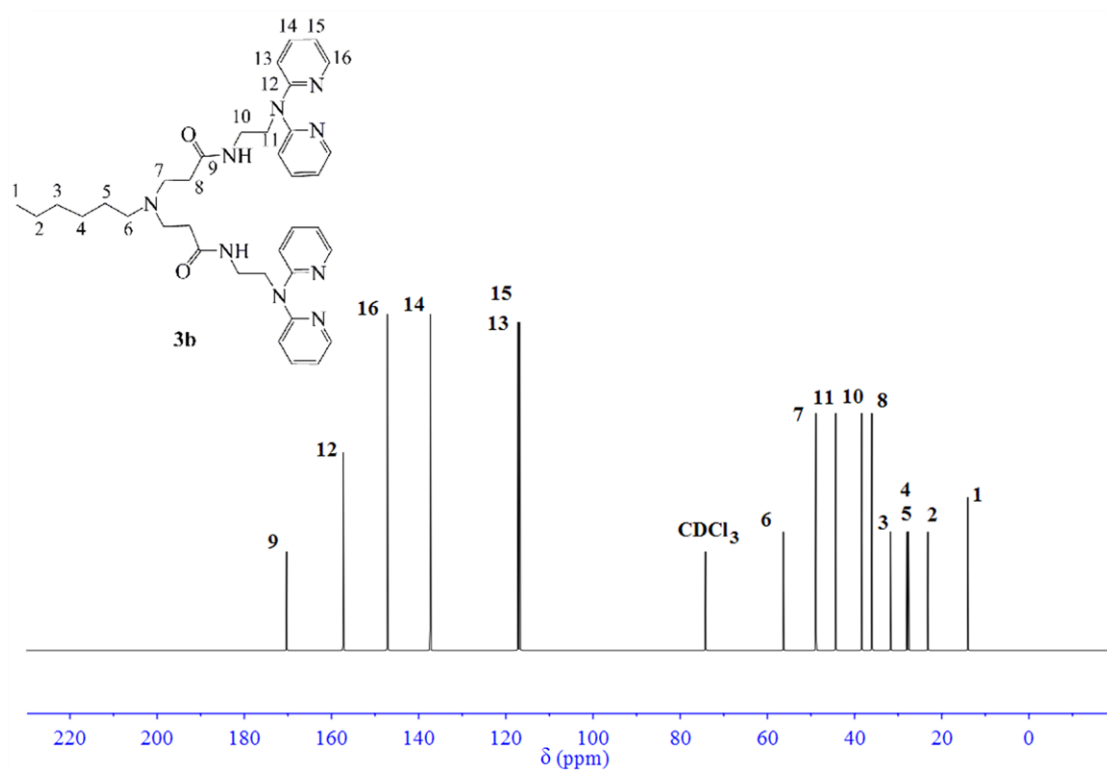

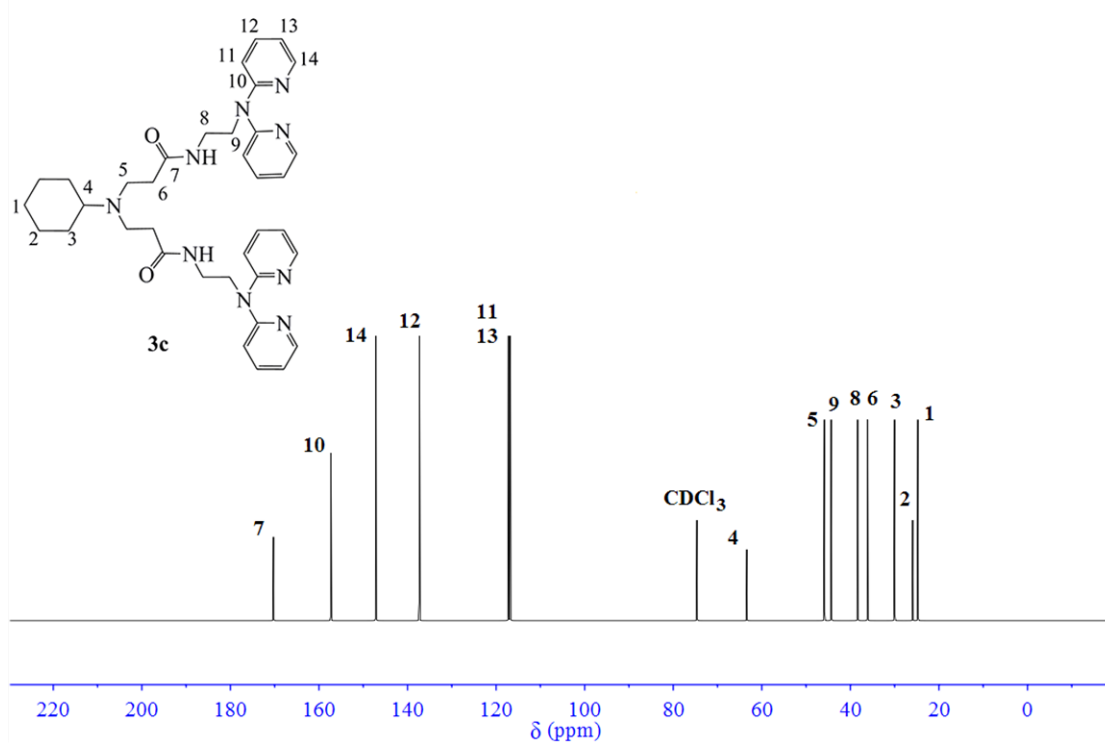

Figure. S4  $^{13}\text{C}$  NMR of ligands

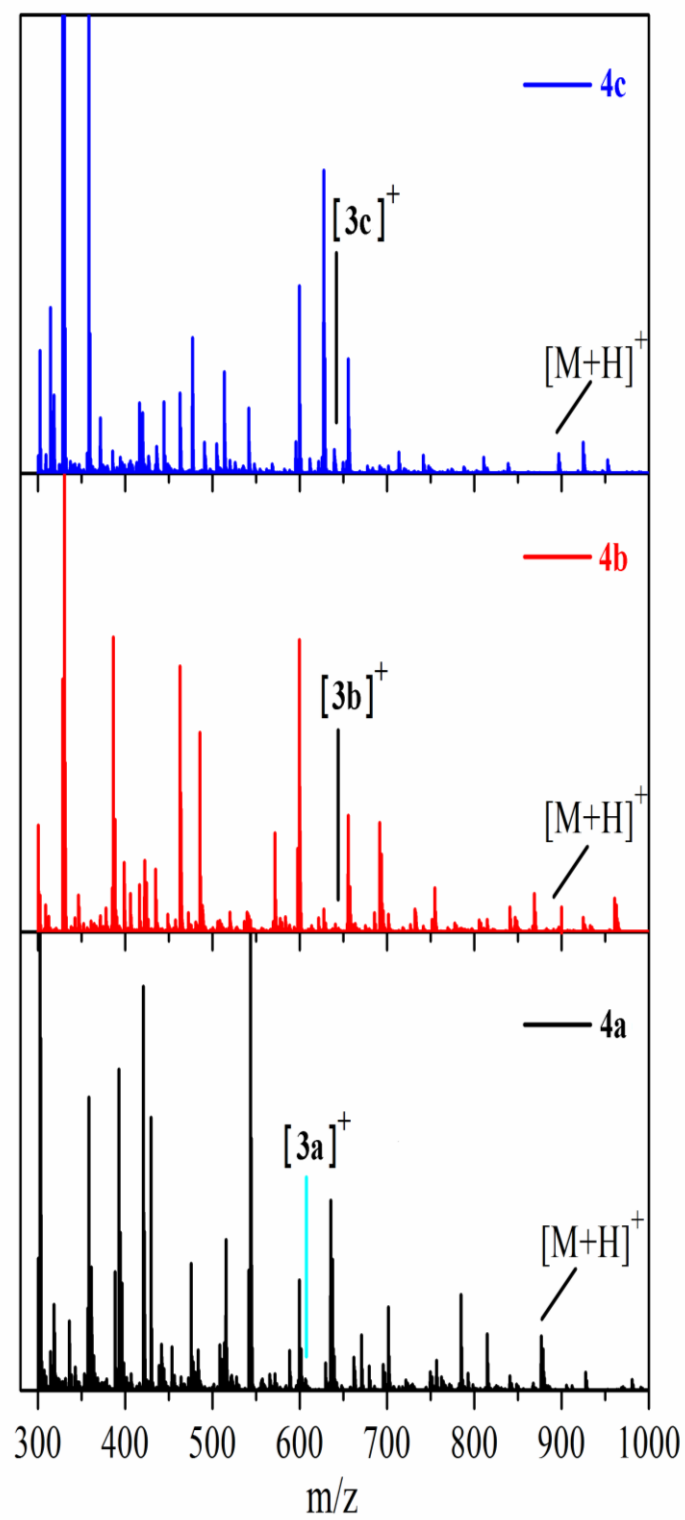

Figure. S5 ESI-MS of nickel complexes
